# Supplementary material
Source: bioRxiv or medRxiv preprint supplement (https://medrxiv.org/highwire/filestream/80823/field_highwire_adjunct_files/3/2020.05.10.20097451-4.pdf)
Supplement: Supplementary file [file 2020.05.10.20097451-4.pdf]

Supplemental Table 6

| Source Type                 | Region (Primary organization)                                                                                               | Population Sampled            | Proposed sampling frame and method                                                                                                               | Intended sample size | Intended sampling dates | Additional Notes                                            |
|-----------------------------|-----------------------------------------------------------------------------------------------------------------------------|-------------------------------|--------------------------------------------------------------------------------------------------------------------------------------------------|----------------------|-------------------------|-------------------------------------------------------------|
| <i>Proposed Study</i>       |                                                                                                                             |                               |                                                                                                                                                  |                      |                         |                                                             |
| Media Report & News Release | Albuquerque, New Mexico, United States (TriCore Reference Laboratories)                                                     | Suspected COVID-19 cases      | Testing done upon referral by healthcare provider                                                                                                |                      | TBD                     |                                                             |
|                             | Andorra (Andorra Government)                                                                                                | General Population            | Test every member of the population                                                                                                              | 77,000               | TBD                     |                                                             |
|                             | Boston, San Francisco, New York City, Seattle, Los Angeles, Minneapolis, United States (National Institutes of Health, CDC) | General Population            | Random samples from blood donors, once a month for 6 months                                                                                      | 6,000                | 01/03/20-31/08/20       |                                                             |
|                             | Canada (Government of Canada)                                                                                               | General Population            | Not specified                                                                                                                                    | 1,000,000            | TBD                     |                                                             |
|                             | Cleveland, Ohio, United States (Ohio State University Wexner Medical Centre)                                                | Health care workers           | Not specified                                                                                                                                    |                      | TBD                     |                                                             |
|                             | India (Indian Council for Medical Research)                                                                                 | General Population            | Not specified                                                                                                                                    | 500,000              | TBD                     |                                                             |
|                             | Santa Clara Valley, Palo Alto, California, United States (Stanford Health Care)                                             | Health care workers           | Test only offered to Stanford doctors, nurses and other workers                                                                                  | 2,500                | TBD                     |                                                             |
|                             | Ukraine (Ukraine Government)                                                                                                | General Population            | Targeting 1,000,000 tests/day                                                                                                                    |                      | TBD                     | ELISA test kit to be used                                   |
|                             | United Kingdom (Department for Health and Social Care & Office for National Statistics)                                     | General Population            | Targeting 1,000 households; past participants in ONS studies; no COVID symptoms. Sample will be age and geographically representative of the UK. | 25,000               | TBD                     | Plan to increase the sample size to 300,000 over 12 months. |
|                             | United States (Baystate Health)                                                                                             | General Population            | Not specified                                                                                                                                    |                      | TBD                     |                                                             |
|                             | United States (National Institutes of Health, CDC)                                                                          | General Population            | Random samples from blood banks nationally taken in September 2020, December 2020, and November 2021                                             | 50,000               | 01/09/20-30/11/21       |                                                             |
|                             | Washington, United States (Washington State Government)                                                                     | General Population            | Random sampling                                                                                                                                  | 25,000               | TBD                     |                                                             |
| Clinical trial database     | Australia (Albury Wodonga Health)                                                                                           | Health care workers           | Not specified                                                                                                                                    | 50                   | TBD                     |                                                             |
|                             | Brazil (Butantan Institute)                                                                                                 | General Population            | Non-probability sample of multiple age groups divided evenly across 10 cities in Brazil, no further specification provided.                      | 4,100                | TBD                     |                                                             |
|                             | Denmark (Herlev Hospital (Multi-centre study))                                                                              | Health care workers           | All hospital staff offered testing                                                                                                               | 30,000               | TBD                     |                                                             |
|                             | Limoges, France (University Hospital, Limoges)                                                                              | ICU Health care workers       | Not specified                                                                                                                                    | 130                  | TBD                     |                                                             |
|                             | Michigan, United States (William Beaumont Hospitals)                                                                        | Health care workers           | Non-probability sample, not further specified.                                                                                                   | 50,000               | 10/04/20-30/06/21       | Test kit developed by EUROIMMUN                             |
|                             | Netherlands (National Institute for Public Health and the Environment (RIVM))                                               | Healthy Individuals           | Participants from PIENTER-3                                                                                                                      | 4,000                | TBD                     |                                                             |
|                             | United Kingdom (Queen's University, Belfast)                                                                                | Healthy and infected children | Non-probability sample, no further specification provided.                                                                                       | 150                  | 13/04/20-13/10/20       |                                                             |

Supplemental Table 6

| Source Type                                                      | Region (Primary organization)                                                        | Population Sampled                                 | Proposed sampling frame and method                                                                                     | Intended sample size | Intended sampling dates                 | Additional Notes                                                                        |
|------------------------------------------------------------------|--------------------------------------------------------------------------------------|----------------------------------------------------|------------------------------------------------------------------------------------------------------------------------|----------------------|-----------------------------------------|-----------------------------------------------------------------------------------------|
| Government / NGO / Health System                                 | United States<br>(National Institutes for Health)                                    | Healthy adults without a history of COVID-19       | 10,000 healthy adult volunteers (>18 years) without a history of COVID-19 from across the US                           | 10,000               | TBD                                     | ELISA test kit developed by NIAID and NIBIB (IgM IgG)                                   |
| <b>Completed Study</b>                                           |                                                                                      |                                                    |                                                                                                                        |                      |                                         |                                                                                         |
| Media Report & News Release                                      | Boston, Massachusetts, United States<br>(Massachusetts General Hospital)             | Healthy Individuals                                | Random sampling of asymptomatic individuals, filling the 1,000 spots first come first serve                            | 1,000                | until 01/05/20                          |                                                                                         |
|                                                                  | Davis, California, United States<br>(University of California, Davis)                | Infected healthcare workers                        | Not specified                                                                                                          |                      | TBD                                     | Test kit developed by UC Davis                                                          |
|                                                                  | Denver, Colorado, United States<br>(National Jewish Health)                          | Patients served by National Jewish Health facility | Targeting 100-200 tests/day; self-referral or referral by a physician to drive thru testing site                       |                      | starting 24/04/20                       |                                                                                         |
|                                                                  | Finland<br>(Finland Institute for Health and Welfare)                                | General Population                                 | Targeting 750 people/week; random invitations to working-age individuals in the capital at first, then everyone later  |                      | starting 10/04/20                       |                                                                                         |
|                                                                  | Germany<br>(Brunswick's Helmholtz Institute for Infectious Disease Research)         | General Population                                 | Not specified                                                                                                          | 100,000              | TBD                                     |                                                                                         |
|                                                                  | Hawaii, United States<br>(Hawaii State Government)                                   | General Population                                 | Not specified                                                                                                          |                      | starting 29/04/20                       |                                                                                         |
|                                                                  | Indiana, United States<br>(Indiana State Department of Public Health)                | General Population                                 | Appears to be random                                                                                                   |                      | TBD                                     |                                                                                         |
|                                                                  | Kolar, Karnataka, India<br>(Kolar state and central governments)                     | Front line workers (health care, police)           | Randomized testing                                                                                                     |                      | starting 30/04/20                       | ELISA and LFIA test kits evaluated by the Indian Council of Medical Research to be used |
|                                                                  | Lombardy, Italy<br>(National Health Council)                                         | Health care workers                                | Targeting 20,000 tests/day; begin with healthcare workers, then those in quarantine with symptoms, then their contacts |                      | TBD                                     | Test kit developed by DiaSorin with sensitivity of 90.4% and specificity of 98.5%       |
|                                                                  | Los Angeles County, California, United States<br>(University of Southern California) | University students at USC                         | Targeting 500-800 students/day                                                                                         | 1,700                | 30/04/20-08/05/20                       |                                                                                         |
|                                                                  | Louisiana, United States<br>(Christus Health)                                        | Health care workers                                | Testing staff members and some patients                                                                                | 20,000               | TBD                                     | Test kit developed by Healgen Scientific with sensitivity of 99% and specificity of 90% |
|                                                                  | New York City, New York, United States<br>(New York State Department of Health)      | General Population                                 | Testing performed on individuals who volunteer and pay                                                                 |                      | TBD                                     | Test kit developed by Ray Biotech                                                       |
|                                                                  | New York City, New York, United States<br>(New York State Department of Health)      | General population                                 | Not specified                                                                                                          | 3,000                | TBD                                     |                                                                                         |
|                                                                  | Plattsburgh, New York, United States<br>(New York State Department of Health)        | General Population                                 | Tests were administered at Market 32 "Price Chopper" in Plattsburgh                                                    |                      | 19/04/20-20/04/20                       |                                                                                         |
|                                                                  | Scottsdale, Tuscon, Arizona, United States<br>(ARCpoint Labs)                        | Paying customers                                   | Customers pay \$60 to be tested                                                                                        |                      | TBD                                     |                                                                                         |
|                                                                  | United States<br>(CDC & Georgia Department of Public Health)                         | General Population                                 | 420 households in Fulton & Dekalb counties                                                                             |                      | 28/04/20-04/05/20                       |                                                                                         |
| Vermont, New Hampshire, Maine, United States<br>(ClearChoiceMD ) | People served by the Clear Choice MD system                                          | Not specified                                      |                                                                                                                        | TBD                  | Test kit developed by Quest Diagnostics |                                                                                         |

Supplemental Table 6

| Source Type                 | Region (Primary organization)                                                                | Population Sampled                                                 | Proposed sampling frame and method                                                                              | Intended sample size | Intended sampling dates | Additional Notes |
|-----------------------------|----------------------------------------------------------------------------------------------|--------------------------------------------------------------------|-----------------------------------------------------------------------------------------------------------------|----------------------|-------------------------|------------------|
| Clinical trial database     | Bremen, Germany<br>(Performa Nord Zentrum für Gesunde Arbeit<br>Arbeitsmedizinischer Dienst) | General Population                                                 | Not specified                                                                                                   | 100                  | TBD                     |                  |
|                             | England<br>(University of Oxford)                                                            | Children and youth                                                 | Not specified                                                                                                   | 3,500                | TBD                     |                  |
|                             | France<br>(Assistance Publique - Hopitaux de Paris)                                          | Medical and paramedical staff                                      | Not specified                                                                                                   | 1,000                | starting 16/03/20       |                  |
|                             | France<br>(Institut Pasteur)                                                                 | Travellers to China before outbreak or suspected of being infected | Non-probability sample                                                                                          | 1,000                | TBD                     |                  |
|                             | Germany<br>(Krankenhaus Reinbek St. Adolf-Stift)                                             | Healthy Individuals                                                | Representative sample of hospital employees, not specified further.                                             | 800                  | TBD                     |                  |
|                             | Hannover, Germany<br>(Medizinische Hochschule Hannover)                                      | Health care workers                                                | Not specified                                                                                                   | 1,000                | TBD                     |                  |
|                             | London, United Kingdom<br>(University College, London)                                       | Health care workers                                                | Non-probability sample                                                                                          | 400                  | TBD                     |                  |
|                             | North Carolina, United States<br>(Michael Runyon, MD)                                        | Atrium health workers and clients                                  | Not specified                                                                                                   | 450,000              | starting 01/05/20       |                  |
|                             | Paris, France<br>(Assistance Publique - Hopitaux de Paris)                                   | Hospitalized children                                              | Not specified                                                                                                   | 960                  | TBD                     |                  |
|                             | Paris, France<br>(Assistance Publique - Hopitaux de Paris)                                   | Parents of hospitalized children                                   | Not specified                                                                                                   | 960                  | TBD                     |                  |
|                             | Vienna, Austria<br>(Ludwig Boltzmann Institute for Lung Health)                              | General Population                                                 | Participants from the age and sex-representative LEAD cohort study will give blood samples at at two timepoints | 5,500                | TBD                     |                  |
|                             | Vienna, Austria<br>(Medical University of Vienna)                                            | Health care workers                                                | Non-probability sample, not specified further.                                                                  | 400                  | TBD                     |                  |
|                             | Wuhan, Hubei, China<br>(Tongji Hospital)                                                     | Health care workers                                                | Not specified                                                                                                   |                      | TBD                     |                  |
| <b>Ongoing Study</b>        |                                                                                              |                                                                    |                                                                                                                 |                      |                         |                  |
| Media Report & News Release | Singapore, Singapore<br>(National Centre for Infectious Diseases)                            | General Population                                                 | Not specified                                                                                                   | 774                  | TBD                     |                  |
|                             | Singapore, Singapore<br>(National Centre for Infectious Diseases)                            | Health care workers                                                | Staff at National University Hospital, Tan Tock Seng Hospital and NCID                                          | 1,096                | TBD                     |                  |
